# Supplementary material for: Mental and Behavioural Responses to Bahá’í Fasting: Looking Behind the Scenes of a Religiously Motivated Intermittent Dry Fast Using a Mixed Methods Approach
Source: Preprints.org preprint supplement (doi:10.20944/preprints202201.0040.v1), 2022-01-05
Supplement: Supplementary file 9 [file supplementary]

$F_{\text{Fisher}}(3.82, 553.35) = 1.58$ ,  $p = 0.182$ ,  $\hat{\omega}_p^2 = 0.00$ ,  $\text{CI}_{95\%} [-0.01, 0.02]$ ,  $n_{\text{pairs}} = 146$

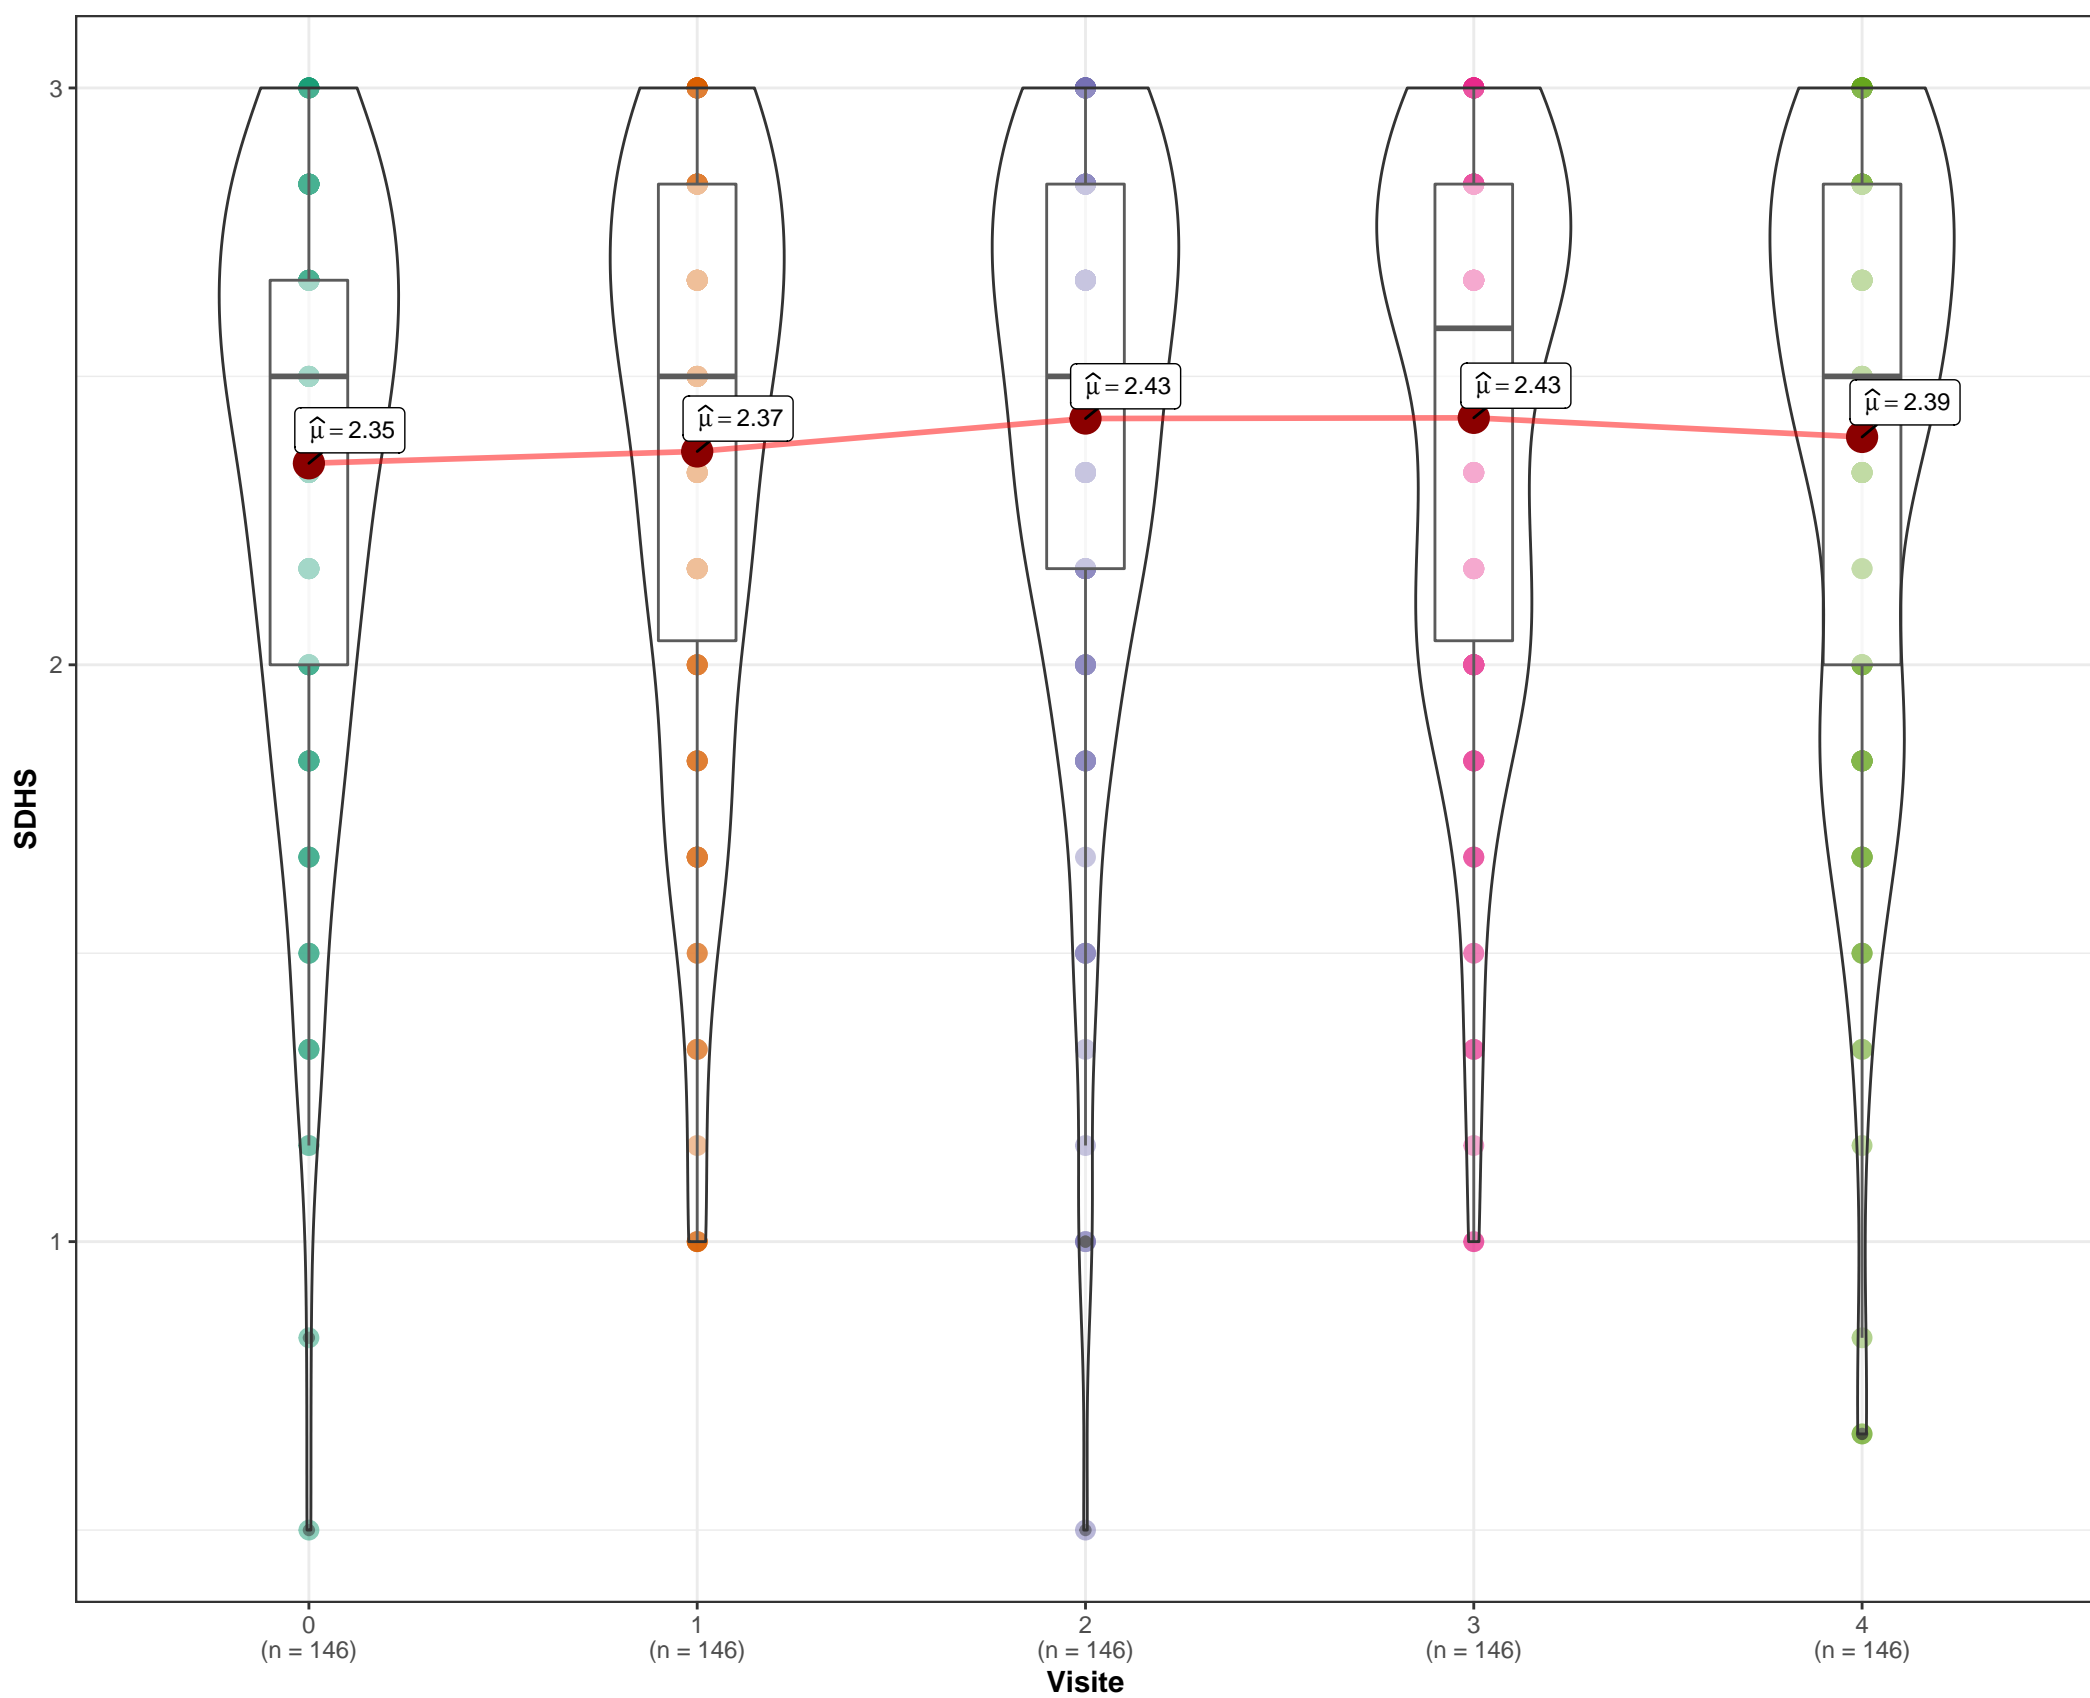

In favor of null:  $\log_e(\text{BF}_{01}) = 4.63$ ,  $r_{\text{Cauchy}}^{\text{JZS}} = 0.71$

Pairwise comparisons: **Student's t-test**; Adjustment (p-value): **Benjamini & Hochberg**
