# Supplementary material for: Mental and Behavioural Responses to Bahá’í Fasting: Looking Behind the Scenes of a Religiously Motivated Intermittent Dry Fast Using a Mixed Methods Approach
Source: Preprints.org preprint supplement (doi:10.20944/preprints202201.0040.v1), 2022-01-05
Supplement: Supplementary file 12 [file supplementary]

# LEITFADEN GRUPPENDISKUSSION

Vorstellung:

Schön dass Sie sich alle Zeit genommen haben. Bevor wir beginnen, möchte ich noch ein paar Dinge erklären. Sie Sollten zunächst wissen, dass ich die Diskussion aufnehmen werde. Dies mache ich, damit ich mich später besser auf das Gesagte beziehen kann, zum anderen aber auch, um sicherzugehen, während der Auswertung keine wichtigen Aspekte zu vergessen. Das geht handschriftlich leider nicht so gut. Die Aufzeichnung wird nicht veröffentlicht und ist nur zum Forschungszweck für diese Studie gedacht. Sollten Sie Unbehagen oder Bedenken deshalb haben, bitte Sagen Sie es und natürlich steht es Ihnen auch frei zu gehen. Bitte sprechen Sie laut und deutlich und versuchen wir darauf zu achten, dass immer nur eine Person spricht. Ich werde das Gespräch moderieren und sicherstellen, dass jede und jeder dran kommt. Besonders wichtig ist heute: Bitte sage Sie genau das, was Sie denken. Machen Sie sich bitte keine Gedanken darüber, ob das das ist, was ich hören will oder was der Nachbar denkt. Es gibt kein richtig oder falsch, ich möchte so viele Informationen bekommen, wie möglich. Je mehr Sie also sagen, desto besser ;) Nun würde ich damit beginnen, dass wir uns einander vorstellen.. Zunächst: Sollen wir uns Siezen oder Duzen?

Ich: Raphaela Ring, 29 Jahre, Soziologie an der Uni Wien bis 2016 (Abschluss), Medizin seit 2017. Qualitativer Teil der Studie.

Ist jetzt schon einige Zeit her... Vier Monate?! (Kontakt aufbauen)

# 1. Einstieg. Fasten allgemein erörtern. Wichtige Aspekte herausfinden.

Fasten wird ja sehr unterschiedlich definiert. Könnten wir zunächst einmal darüber sprechen, was „Fasten“ in Ihren Augen bedeutet? *Wird als Baha'í oder als nicht religiöser M geantwortet?*

Sind jetzt noch Auswirkungen des letzten Mal Fastens in eurem Lebensalltag präsent?

*Was? Beschreiben lassen. Positiv oder negativ bewertet?*

Hat das Fasten immer / nie Einfluss auf den Rest des Jahres gehabt? Beschreiben.

Wie ist es denn für euch zu fasten? Wie erlebt ihr es ganz allgemein? Wie war es dieses Jahr?

Was löst es aus? --- *Würden die anderen das auch so beschreiben?*

Welche Erfahrungen habt ihr gemacht?

Gibt es auch gesundheitliche Vorteile am Fasten? Verändert sich euer Körper durch die Fastenzeit? Fitness ^ Blutdruck ^ Verdauung, Haut?

Wie sieht es mit der Ernährung während des Fastens aus?

*Änderungen? Beschreiben – Essen&Trinken. Wird das beibehalten?*

Nicht trinken können ist überhaupt kein Problem, oder...?

## 2. Unklares aufdecken. Spiel

|                                                      |
|------------------------------------------------------|
| Verschiedene<br>Szenarien kreieren.<br>Kreativ sein. |
|------------------------------------------------------|

Wir machen jetzt ein Gedankenexperiment. Ein Spiel.

Angenommen: Jemand ist ganz neu zum Baha'i Glauben gekommen

– Sie oder er? (*Gruppenentscheidung!*)

- X ist ganz neu in der Gemeinde und möchte zum ersten Mal mit fasten. X kommt auch nicht aus einer Baha'i Familie. Wie würdet ihr X Tag idealerweise gestalten, damit X X erste Fastenzeit gut und ohne große Hindernisse bewältigt?

Wir kennen X Alltag nicht, wissen auch nicht ob X Familie hat oder nicht, zur Fastenzeit arbeiten muss oder nicht... Wir wissen nur, dass X gesund ist und eben zum ersten Mal mitmachen möchte.

- Zuhause sein oder woanders hinfahren? (aufs Land, reisen etc)
- Arbeiten?
- Wann aufstehen?
- Familie? Welche Unterschiede ergeben sich daraus?
- Alter? Einfluss?
- Alleine oder in der Gemeinde fasten?
- Was sollte X essen oder welche Mengen? Und trinken? Kaugummikauen zwischendurch
- Wie integriert X die Religion in die Fastenzeit? Was sollte X an religiösen Praktiken vollziehen zusätzlich zum Fasten? Sollte er überhaupt mehr tun als das? Lesen?
- Was braucht X an persönlichen Eigenschaften, um die Zeit gut zu bewältigen? Sollte X ein spiritueller Mensch sein? Oder eher ein Pragmatiker?
- Wird es X leicht fallen?

Und wenn wir ganz zum Schluss noch weg gehen von der durch die Religion vorgegebenen Zeiten: Wie lange sollte X fasten? Gibt es eine Dauer die einfacher ist? Wird es irgendwann schwieriger? Ändert sich was? Weshalb?

### 3. Religiöses Fasten – Motivation, Bedeutung – therapeutisches Fasten

Das Fasten kommt ja nicht nur in der Religion sondern auch in der Medizin schon seit Jahrhunderten vor. Was denkt ihr: Wieso ist das Fasten auch ein therapeutisches Mittel in der Medizin um Krankheiten zu behandeln?

Es wird ja nicht nur bei den Baha'i gefastet, sondern auch bei den Katholiken, Muslimen, Juden..

Weshalb ist das Fasten Teil so vieler unterschiedlicher Religionen? Wie schätzt ihr das ein?

Und weshalb hat Baha'ullah euch zum fasten aufgerufen?

- *Ist fasten Zwang oder freiwillig?*
- *Struktur gebend? Lernen was man braucht. Lernen, dass man Krisen meistern kann.*

Was ist denn am Fasten religiös? Ist es spirituell? Geistig? *Begriffe erklären lassen (VORSICHT Bei Spirituell..)*
