# Supplementary material for: Mental and Behavioural Responses to Bahá’í Fasting: Looking Behind the Scenes of a Religiously Motivated Intermittent Dry Fast Using a Mixed Methods Approach
Source: Preprints.org preprint supplement (doi:10.20944/preprints202201.0040.v1), 2022-01-05
Supplement: Supplementary file 14 [file supplementary]

$F_{\text{Fisher}}(3.75, 544.34) = 13.36, p = < 0.001, \hat{\omega}_p^2 = 0.08, \text{CI}_{95\%} [0.04, 0.12], n_{\text{pairs}} = 146$

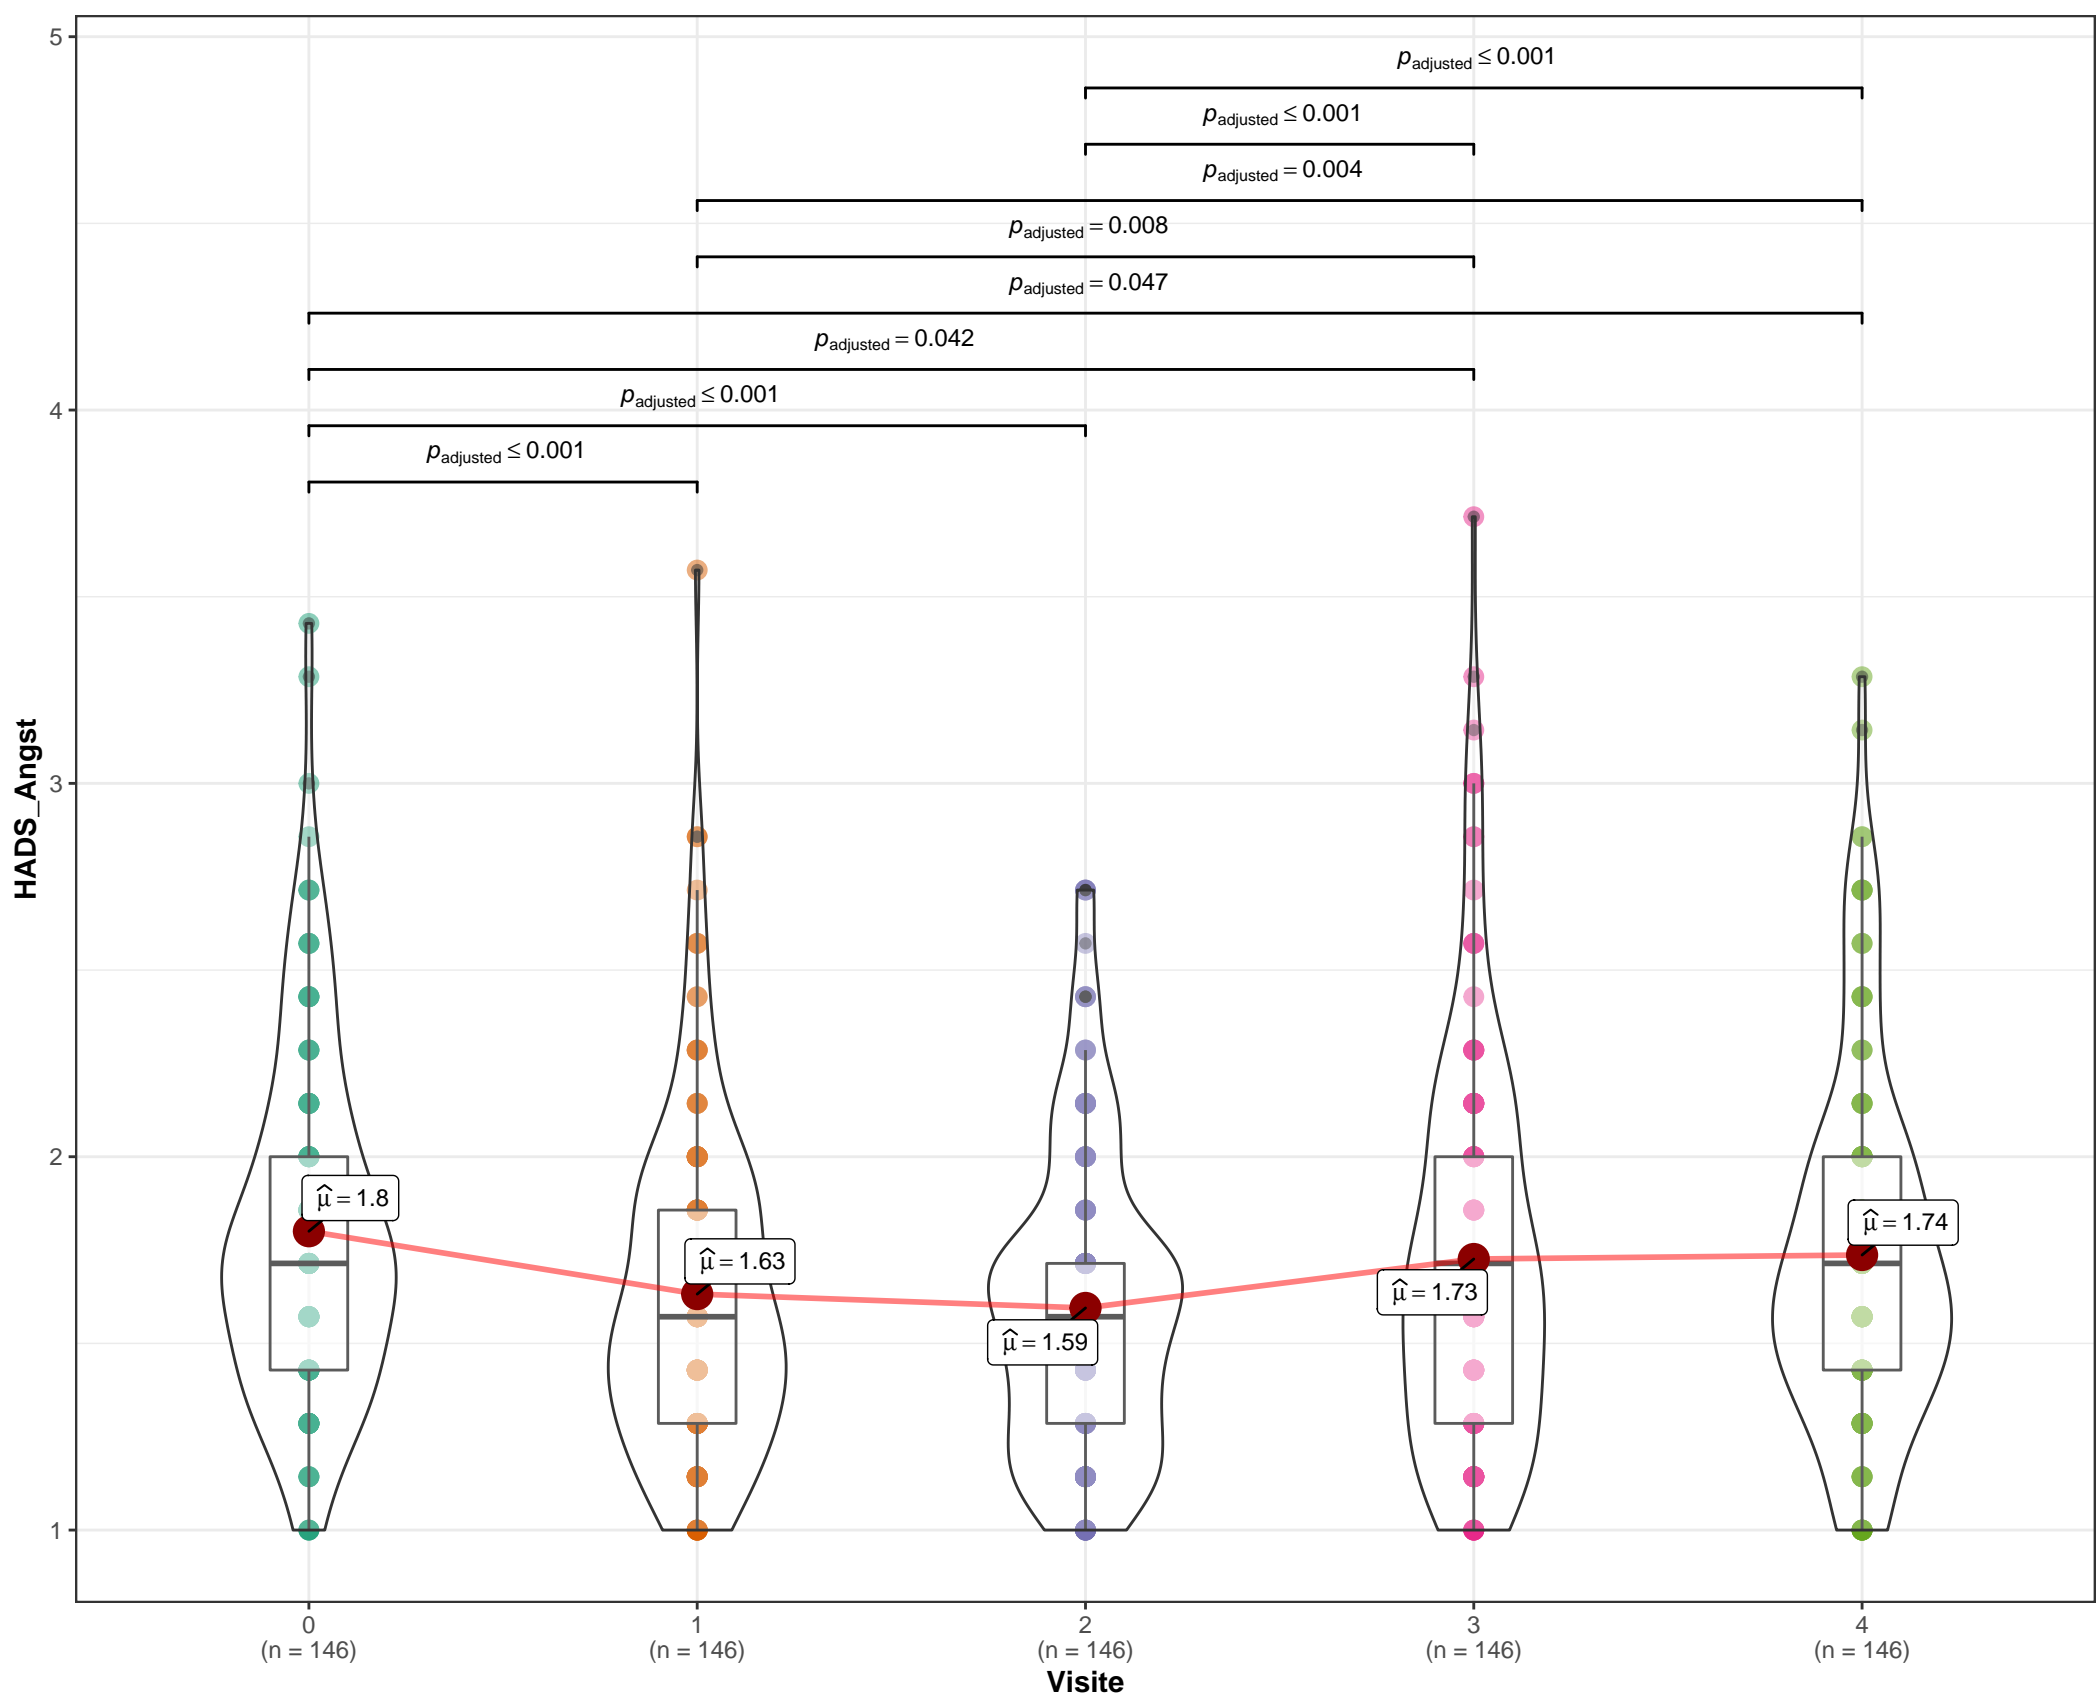

In favor of null:  $\log_e(\text{BF}_{01}) = -16.83, r_{\text{Cauchy}}^{\text{JZS}} = 0.71$

Pairwise comparisons: **Student's t-test**; Adjustment (p-value): **Benjamini & Hochberg**
