# Supplementary material for: Mental and Behavioural Responses to Bahá’í Fasting: Looking Behind the Scenes of a Religiously Motivated Intermittent Dry Fast Using a Mixed Methods Approach
Source: Preprints.org preprint supplement (doi:10.20944/preprints202201.0040.v1), 2022-01-05
Supplement: Supplementary file 15 [file supplementary]

$F_{\text{Fisher}}(3.63, 526.37) = 0.80$ ,  $p = 0.517$ ,  $\widehat{\omega_p^2} = 0.00$ ,  $\text{CI}_{95\%} [-0.01, 0.01]$ ,  $n_{\text{pairs}} = 146$

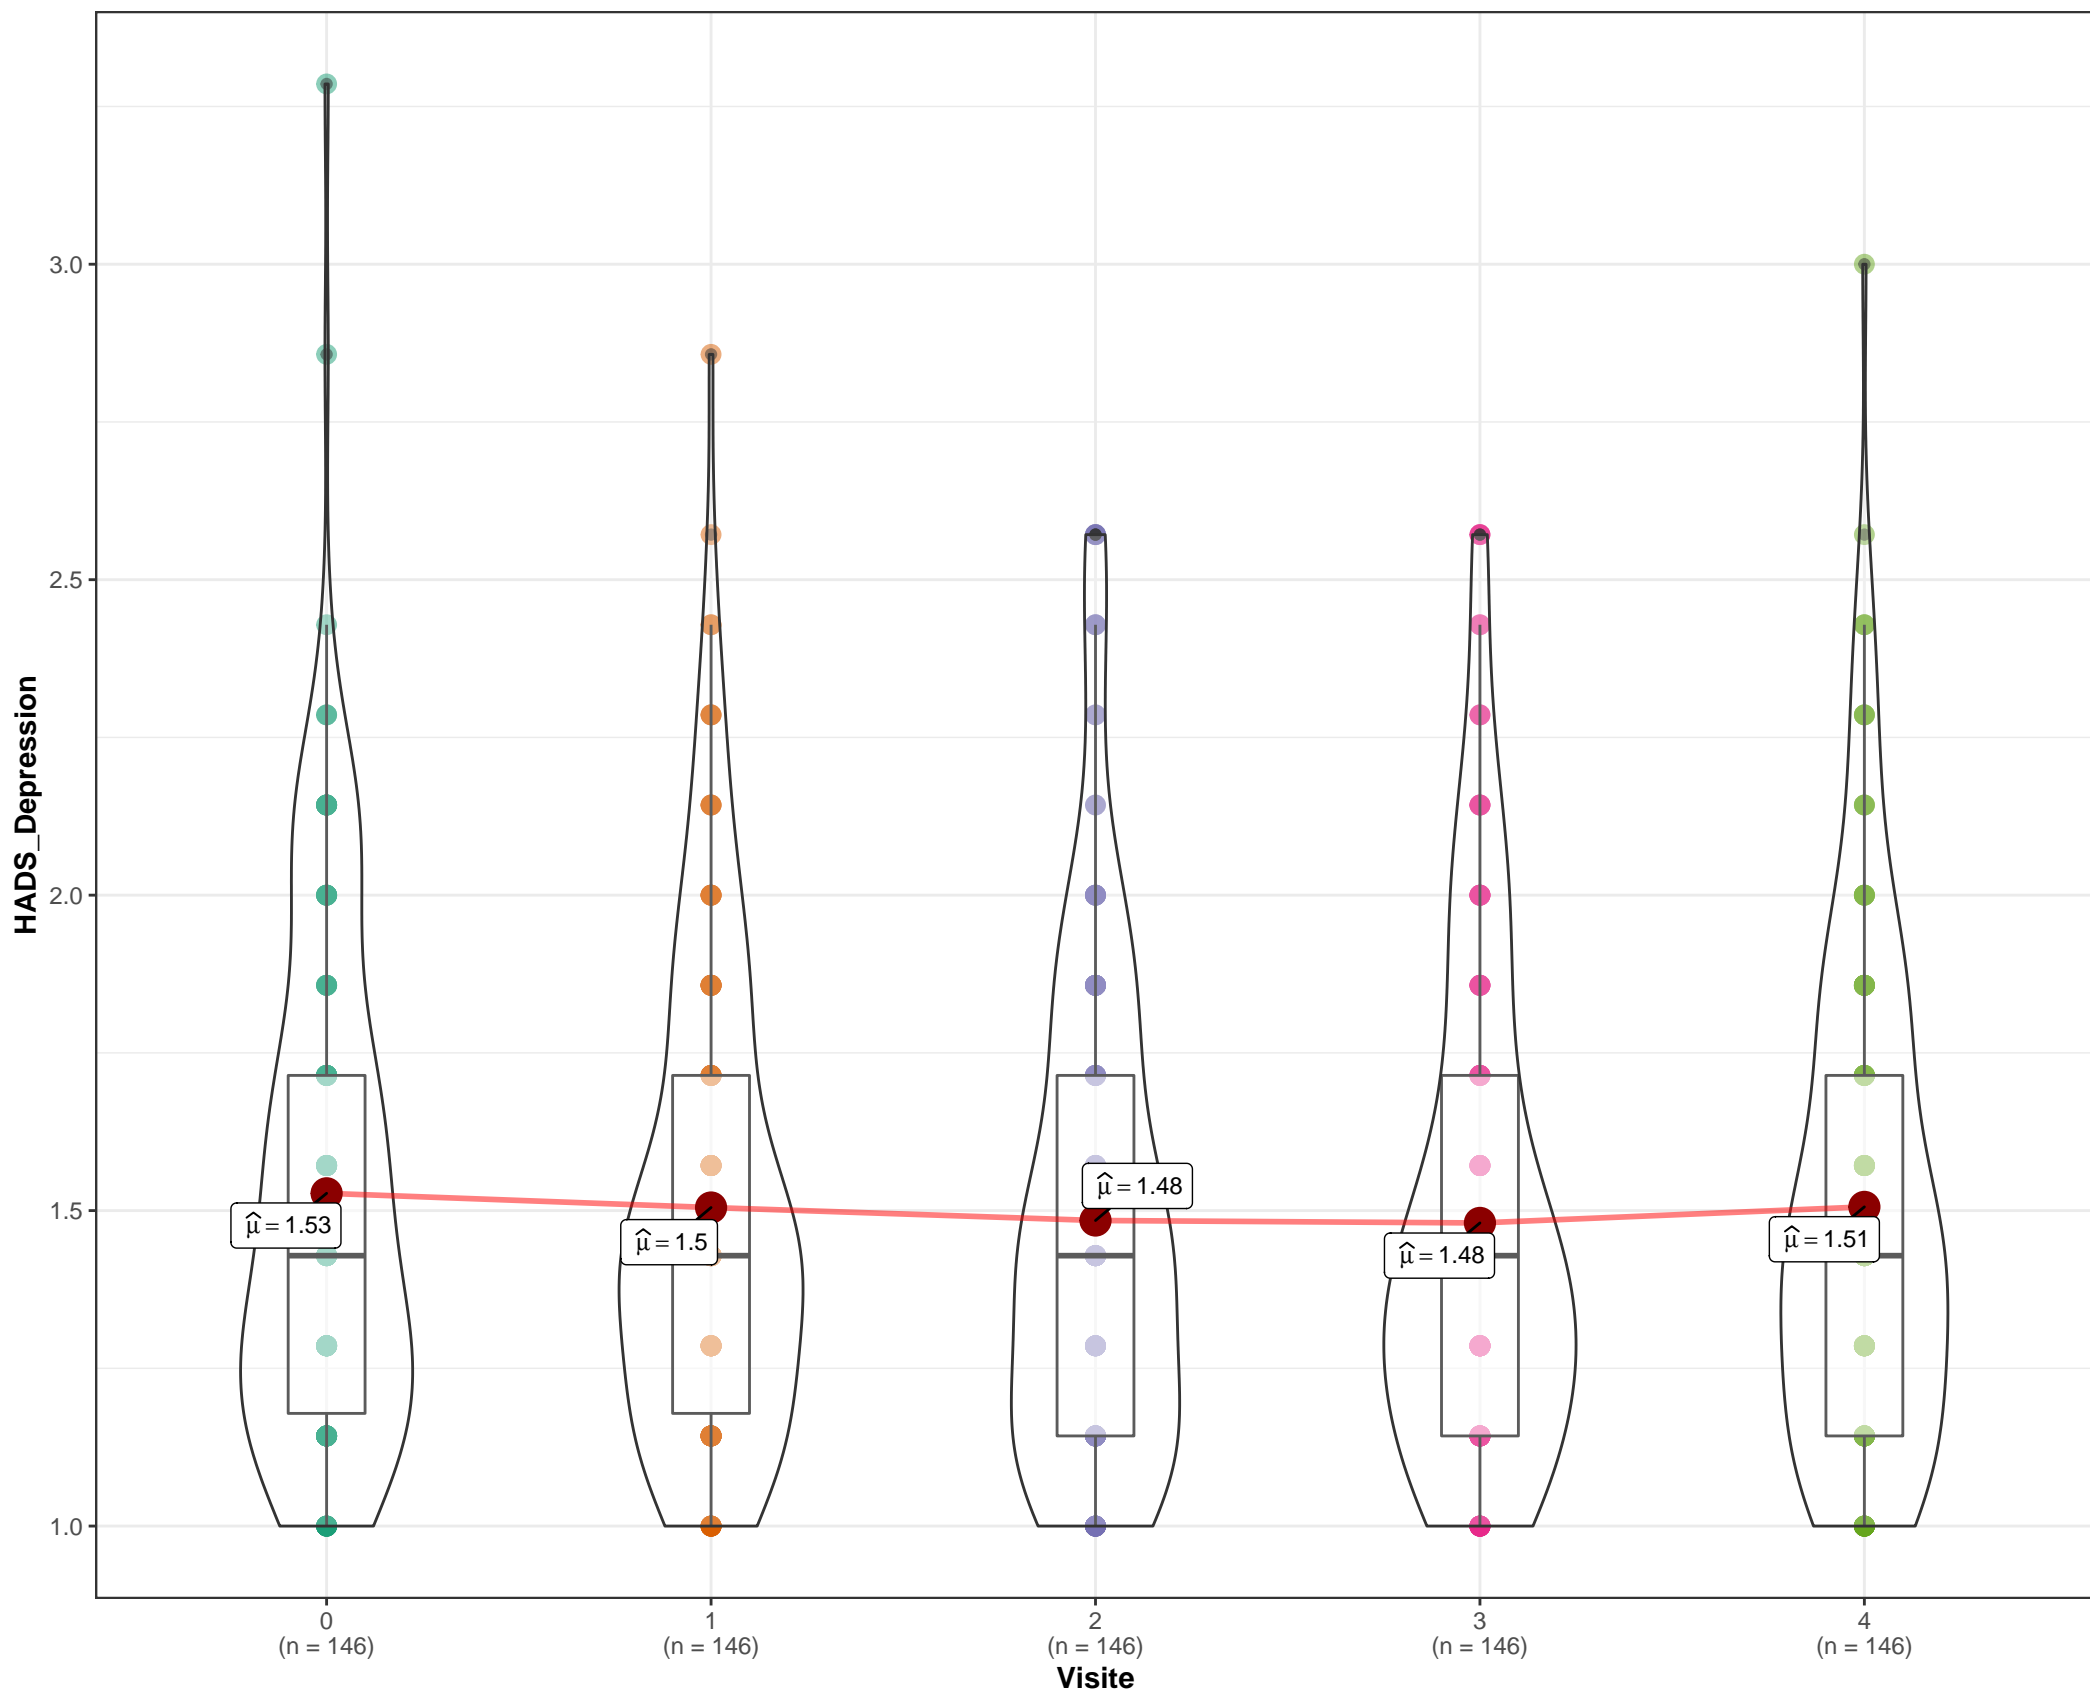

In favor of null:  $\log_e(\text{BF}_{01}) = 6.11$ ,  $r_{\text{Cauchy}}^{\text{JZS}} = 0.71$

Pairwise comparisons: **Student's t-test**; Adjustment (p-value): **Benjamini & Hochberg**
