# Supplementary material for: Mental and Behavioural Responses to Bahá’í Fasting: Looking Behind the Scenes of a Religiously Motivated Intermittent Dry Fast Using a Mixed Methods Approach
Source: Preprints.org preprint supplement (doi:10.20944/preprints202201.0040.v1), 2022-01-05
Supplement: Supplementary file 18 [file supplementary]

## Interviewguide V0

- Seit wann sind Sie Mitglied der Baha'i Gemeinde?  
*Konvertiert? --> Was hat Sie dazu bewegt? // Geborene Baha'i..*
- Sie sind gläubiges Mitglied der Baha'i Gemeinde. Können Sie mir beschreiben, was Sie zu einer Baha'i macht / Was das bedeutet? (Einstellungen, Gestaltung des Alltags etc., wichtige Rituale, Gemeinschaftliche Aktivitäten)
- Würden Sie sich denn auch als spirituellen Menschen beschreiben?
- Können Sie mir Spiritualität näher beschreiben? Was bedeutet spirituell für Sie?
- Was ist Fasten spirituell? **ODER** Warum würden Sie Ihre Religion nicht als spirituell bezeichnen? Welche Unterschiede sehen Sie?
- Können Sie mir grob erklären was das Fasten für einen Baha'i bedeutet?
- Gibt es noch andere Aspekte die das Fasten für Sie beinhaltet?

*gesünder // Zeit mit mir // Spiritualität  
Gemeinschaft - woher kommt die Erwartung? //  
Verbindung zu Gott - woher kommt die Erwartung //  
Nein*

- Wann haben Sie zuletzt gefastet?  
ja, XJ. welche Erfahrungen haben Sie damit gemacht? (ggf. körperlich/Körpergefühl, geistig, währenddessen, danach) *Näher beschreiben lassen. Welche Begriffe fallen? Erklären lassen. Positiv / Negativ bewertet?*
- (Nie) Wie bereiten Sie sich jetzt darauf vor?  
Wer unterstützt Sie?
- Was ist Ihnen in der Vorbereitung der Fastenzeit besonders wichtig?
- Welche/ Gibt es Anpassungen Ihres Lebensalltags die nötig sind um das Fasten zu ermöglichen?
- Wenn Sie das Fasten abends brechen, planen Sie das selbe zu essen wie immer oder isst man auch anders während der Fastenzeit als sonst? Was ändern Sie und warum?
- (*--> Reines Regelbefolgen ggf. mit erwähnen*): Fällt Ihnen das Fasten leicht? Ist es problematisch?
- Wenn Sie an die anstehende Zeit denken: Was löst es in Ihnen aus?
- Welche Erwartungen an das Fasten haben sie?
- Was denken Sie - wodurch wird es Ihnen gelingen, die Fastenzeit (trotzdem) zu bewältigen?
- Gibt es noch etwas, das Sie gerne ergänzen möchten?

Vielen Dank. Wir sehen uns dann in drei Wochen wieder (Termin bekannt?)

## Interviewguide V1

- Wie geht es dir? Und wie ging es dir die letzten Tage? - Gibt es Veränderungen in deinem Befinden?
- War etwas anders als sonst? Wie kommt das?
- Hat sich deine Selbstwahrnehmung verändert?
- Hast du in den letzten zwei Wochen etwas Besonderes erlebt, das du ohne das Fasten vielleicht nicht erlebt hättest? - Was? Wie hat sich das angefühlt?
- Hast du an dir selbst Veränderungen wahrgenommen in den letzten zwei Wochen?
  - Welche Veränderungen waren das? Wie kommt das?
  - Wie hat sich dein Körper in den letzten zwei Wochen im Vergleich zu davor angefühlt?
- Hast du momentan das Gefühl, dass dein Körper bekommt was er braucht? - Was fehlt?
- *Was isst du momentan? Gibt es etwas Neues in deiner Ernährung, das du vor der Fastenzeit nicht gegessen oder getrunken hast?*
  
- Was ist am Fasten religiös?
- Gab es in den letzten Tagen Momente anhand derer du mir den geistigen Aspekt des Fastens erklären kannst?
- Wie nimmst du dein Umfeld momentan wahr?
- Bist du derzeit genauso konzentriert wie sonst? Was hat sich geändert?
- Kennst du das was du mir gerade beschrieben hast aus früheren Fastenerlebnissen?
  
- Welche Erwartungen hattest du an die Fastenzeit? Und welche Erwartungen hast du jetzt gerade an die Fastenzeit?
- Inwiefern haben sich diese Erwartungen bisher erfüllt?
- Wie zufrieden bist du bisher mit der Fastenzeit?
- Wie zufrieden bist du bisher damit wie du das Fasten umsetzt? -- **Gibt es irgendwas was du in den kommenden Tag noch ändern wollen würdest oder was du bei anderen siehst, das dir das Fasten erleichtern würde.**
- Gab es herausfordernde Momente? Wie bist du damit umgegangen?
  
- Hast du im Vergleich der nicht Fastenzeit zur Fastenzeit das Gefühl einen strukturierteren Tag zu haben?
- Welche Routinen und Gewohnheiten sind dir in der Fastenzeit wichtig?
- Welche Unterschiede hat dein Tag als Fastender im Gegensatz zu einem Tag eines Menschen, der nicht fastet?
- Warum fastest du?
- Kannst du mir erklären, was dich zum Fasten motiviert? / Für wen fastest du?
- Wenn du jemand anderen motivieren wolltest zu fasten, was würdest du sagen?
  
- Fastest du alleine oder fastest du gemeinschaftlich?... --> ! **Also gemeinschaftlich bedeutet in direktem Kontakt mit anderen Baha'i Mitgliedern, der Familie oder Freunden.**
- Hast du beim Fasten das Gefühl mit den Menschen in deinem Umfeld verbundener zu sein als sonst?
- Mit wem bist du verbundener als sonst?
- Inwieweit ist das auf das das Fasten zurückzuführen?
- Wer unterstützt dich beim Fasten? Wen unterstütz du beim Fasten?
- Wieso ist das wichtig? / Wieso ist das soziale Umfeld nicht wichtig?
  
- Wie fühlst du dich, wenn du auf die vergangenen zwei Wochen zurückblickst?
- Wünschst du dir etwas, das sich jetzt geändert hat, langfristig halten zu können? Was ist das? Warum?
- Gibt es noch etwas, was dir einfällt? Habe ich etwas vergessen? Möchtest du noch etwas hinzufügen?

## Interviewguide V2

- Kannst du mir bitte den ersten Tag beschreiben, an dem du nicht mehr gefastet hast.  
*Was gemacht, wie gefühlt, mit wem verbracht? allein/gemeinsam - weshalb? Was etwas anders?*
- Würden wir heute zum ersten Mal über die vergangene Zeit vor, während und nach dem Fasten sprechen, wir würdest du es zusammenfassen?
- Kannst du mir beschreiben, wie du dich jetzt im Vergleich zu während des Fastens fühlst?
- Was hast du während des Fastens dazu gelernt, welche Erkenntnisse hast du gesammelt?
- Wie viel Zeit hattest du in den letzten drei Wochen für Dinge, die dir wichtig sind?  
*Sind das Tätigkeiten/Menschen etc. die dir auch während der Fastenzeit wichtig waren?*
- Wie war es während der Fastenzeit mit diesen Tätigkeiten / Menschen? *Mehr/weniger Zeit?*
- Bist du nun wieder in einen Alltag integriert, den du als deinen normalen Lebensalltag beschreiben würdest? *Falls nein: Was ist anders? Wie kommt das? Veränderungen erfragen*
- Inwieweit würdest du deinen Alltag als stressig beschreiben? Gab es Veränderungen während der Fastenzeit?
- Hatte die Fastenzeit noch weiteren Einfluss / Welchen Einfluss hatte die Fastenzeit auf deinen Lebensalltag? *Struktur? Ernährung?*
- Wie fühlst du dich in diesem Lebensalltag? Ging es dir damit während des Fastens anders?
- Kannst du mir beschreiben, wie viel du seit dem Fastenausstieg isst und trinkst im Vergleich zu vor dem Fasten?
- Gibt es Veränderungen bei den von dir gekauften Lebensmitteln? *Qualität, sind es die gleichen wie davor?*
- Wie hast du das Einkaufen an sich nach dem Fasten erlebt? Ist das noch immer so?
- Welchen Einfluss hat die Fastenzeit auf dich als Mitglied einer Religionsgemeinschaft genommen?
- Wie wichtig ist dir die Teilnahme an Treffen der Religionsgemeinschaft? *Wieso? Häufigkeit, aus wem besteht diese "Gemeinschaft"*
- Kannst du mir beschreiben, welche Anteile des Fastens es zu mehr als nur Nahrungs- und Flüssigkeitskarenz machen? *Erfahrungen, Gefühl, Vorschrift*
- Welche Bedeutung hat eine Vorschrift deiner Religion wie jene, einmal jährlich zu fasten, für dich?
- Kannst du einschätzen, ob es für dich als Baha'i gleichermaßen möglich wäre, dich als religiösen Menschen zu erfahren, wenn es solche Gebote nicht gäbe?
- Gab es nach dem Fasten etwas, das du langfristig behalten wolltest? Wie sehr konntest du diesen Vorsatz bis jetzt erfüllen?
- Was brauchst/bräuchtest du, um diese Vorsätze halten zu können?
- Möchtest du noch etwas ergänzen?
